1                   **Hepatitis C Virus (HCV) diagnosis, epidemiology**  
2                   **and access to treatment in a UK cohort**

3  
4                   Emily Adland<sup>1</sup>, Gerald Jesuthasan<sup>2</sup>, Louise Downs<sup>2</sup>,  
5                   Victoria Wharton<sup>3</sup>, Gemma Wilde<sup>3</sup>, Anna McNaughton<sup>4</sup>,  
6                   Jane Collier<sup>3</sup>, Eleanor Barnes<sup>3,4,5</sup>, Paul Klenerman<sup>2,3,4,5</sup>,  
7                   Monique Andersson<sup>2</sup>, Katie Jeffery<sup>2</sup>, Philippa C. Matthews<sup>2,4\*</sup>

8  
9                   \* **Corresponding author:** Email [philippa.matthews@ndm.ox.ac.uk](mailto:philippa.matthews@ndm.ox.ac.uk)

10  
11                   <sup>1</sup> Department of Paediatrics, Peter Medawar Building for Pathogen Research,  
12                   South Parks Road, Oxford OX1 3SY, UK

13                   <sup>2</sup> Department of Infectious Diseases and Microbiology, John Radcliffe  
14                   Hospital, Headley Way, Headington, Oxford OX3 9DU, UK

15                   <sup>3</sup> Department of Hepatology, John Radcliffe Hospital, Headley Way,  
16                   Headington, Oxford OX3 9DU, UK

17                   <sup>4</sup> Nuffield Department of Medicine, Peter Medawar Building for Pathogen  
18                   Research, South Parks Road, Oxford OX1 3SY, UK

19                   <sup>5</sup> Oxford NIHR Biomedical Research Centre, John Radcliffe Hospital, Headley  
20                   Way, Headington, Oxford OX3 9DU, UK

21

22                   **Key words:**

23                   HCV, antigen, genotype, epidemiology, diagnosis, ethnicity, DAA, treatment,  
24                   cure, sustainable development goals

25

26 **ABBREVIATIONS**

27 DAA – Direct Acting Antiviral

28 ELISA – Enzyme linked immunosorbent assay

29 HCV – Hepatitis C Virus

30 HCV-Ab – IgG antibody to Hepatitis C virus

31 HCV-Ag – Hepatitis C virus core antigen

32 HCV RNA – Hepatitis C ribonucleic acid (viral load)

33 MSM – men who have sex with men

34 NAT - nucleic acid testing

35 PCR – polymerase chain reaction (test for viral load)

36 PPV – positive predictive value

37 PWID – people who inject drugs

38 SDG – Sustainable Development Goals

39 SVR - sustained virologic response

40 WHO – World Health Organisation

41

42 **ABSTRACT**

43 **Background:** As direct acting antiviral (DAA) therapy is progressively rolled  
44 out for patients with hepatitis C virus (HCV) infection, careful scrutiny of HCV  
45 epidemiology, diagnostic testing, and access to care is crucial to underpin  
46 improvements in delivery of treatment.

47

48 **Methods:** We performed a retrospective study of HCV infection in a UK  
49 teaching hospital to evaluate the performance of different diagnostic  
50 laboratory tests, to describe the population with active HCV infection, and to  
51 determine the proportion of these individuals who access clinical care.

52

53 **Results:** Over a total time period of 33 months between 2013 and 2016, we  
54 tested 38,510 individuals for HCV infection and confirmed a new diagnosis of  
55 active HCV infection (HCV-Ag+ and/or HCV RNA+) in 359 (positive rate  
56 0.9%). Our in-house HCV-Ab test had a positive predictive value of 87% when  
57 compared to repeat HCV-Ab testing in a regional reference laboratory,  
58 highlighting the potential for false positives to arise based on a single round of  
59 antibody-based screening. Of those confirmed Ab-positive, 70% were HCV  
60 RNA positive. HCV-Ag screening performed well, with 100% positive  
61 predictive value compared to detection of HCV RNA. There was a strong  
62 correlation between quantitative HCV-Ag and HCV RNA viral load ( $p < 0.0001$ ).  
63 Among the 359 cases of infection, the median age was 37 years, 85% were  
64 male, and 36% were in prison. Among 250 infections for which genotype was  
65 available, HCV genotype-1 ( $n=110$ ) and genotype-3 ( $n=111$ ) accounted for  
66 the majority. 117/359 (33%) attended a clinic appointment and 48 (13%) had

67 curative treatment defined as sustained virologic response at 12 weeks  
68 (SVR<sub>12</sub>).

69

70 **Conclusions:** HCV-Ab tests should be interpreted with caution as an  
71 indicator of population prevalence of HCV infection, both as a result of the  
72 detection of individuals who have cleared infection and due to false positive  
73 test results. We demonstrate that active HCV infection is over-represented  
74 among men and in the prison population. A minority of patients with a  
75 diagnosis of HCV infection access clinical care and therapy; enhanced efforts  
76 are required to target diagnosis and providing linkage to clinical care within  
77 high risk populations.

78

## 79 **INTRODUCTION**

80 The World Health Organization (WHO) estimates that 71 million people are  
81 chronically infected with the Hepatitis C Virus (HCV), and 0.4 million people  
82 die each year as a consequence [1, 2]. United Nations Sustainable  
83 Development Goals (SDGs) [3] and Global Health Sector Strategy on Viral  
84 Hepatitis [2] have a target of elimination of viral hepatitis as a public health  
85 threat by the year 2030. The need for enhancing HCV diagnosis has acutely  
86 become more pertinent as a result of the availability of highly effective Direct  
87 Acting Antiviral (DAA) treatment [4]. On a worldwide basis, an estimated 80-  
88 85% of individuals with chronic infection are unaware of their infection [5, 6],  
89 although this figure may be somewhat lower in the UK, and among those with  
90 a diagnosis a minority currently receive treatment.

91

92 Enhanced diagnosis of HCV is important not only as a pathway to treatment  
 93 for individual patients, but also to allow confident estimates of the true  
 94 prevalence of chronic HCV in different settings, to underpin appropriate  
 95 allocation of resources and development of infra-structure for treatment [7].  
 96 Diagnosis of HCV is based on three different approaches to testing, which  
 97 may be used alone or in combination. These are (i) detection of an IgG  
 98 antibody by ELISA (HCV-Ab); (ii) detection of HCV core antigen (HCV-Ag);  
 99 (iii) Nucleic acid testing (NAT) to detect HCV RNA by PCR (Table 1)

100

101 **Table 1: Comparison of diagnostic laboratory tests used to detect**  
 102 **exposure and activity of HCV infection**

103

| Screening tool | HCV-Ab                                                                                                                                                                                                                                                                                                                                                                                 | HCV-Ag                                                                                                                                                                                            | PCR for HCV RNA                                                                                                                                                                                                                                                                                                                                                                                        |
|----------------|----------------------------------------------------------------------------------------------------------------------------------------------------------------------------------------------------------------------------------------------------------------------------------------------------------------------------------------------------------------------------------------|---------------------------------------------------------------------------------------------------------------------------------------------------------------------------------------------------|--------------------------------------------------------------------------------------------------------------------------------------------------------------------------------------------------------------------------------------------------------------------------------------------------------------------------------------------------------------------------------------------------------|
| Pro's          | <ul style="list-style-type: none"> <li>◆ Widely available</li> <li>◆ Inexpensive</li> <li>◆ Much experience and data for use as first-line approach to screening for HCV exposure (underpins many old seroprevalence studies)</li> </ul>                                                                                                                                               | <ul style="list-style-type: none"> <li>◆ Diagnostic of active infection (not past exposure)</li> <li>◆ Improved specificity and reduced window period compared to HCV-Ab [8-13].</li> </ul>       | <ul style="list-style-type: none"> <li>◆ Accepted gold-standard diagnostic test for active infection (not past exposure)</li> <li>◆ Allows quantitative monitoring of viraemia; useful for monitoring therapy</li> <li>◆ Genome amplification allows other information to be ascertained (e.g. genotype; drug resistance).</li> <li>◆ Can potentially be applied to dried blood spots (DBS)</li> </ul> |
| Con's          | <ul style="list-style-type: none"> <li>◆ Subject to inter-assay variability and a variable rate of false positive results [14, 15]; false positive has been associated with ethnicity [16, 17], age [16], raised IgM and erythrocyte sedimentation rate (ESR) [14], auto-antibodies [18], and prosthetic devices [19].</li> <li>◆ Test of exposure, not of active infection</li> </ul> | <ul style="list-style-type: none"> <li>◆ Not universally available</li> <li>◆ More expensive than HCV-Ab</li> <li>◆ Not consistently regarded as sufficiently sensitive to replace PCR</li> </ul> | <ul style="list-style-type: none"> <li>◆ Not universally available</li> <li>◆ Expensive: beyond the financial reach of many resource-limited settings</li> </ul>                                                                                                                                                                                                                                       |

104

105 Reliance upon HCV-Ab screening has potentially distorted epidemiological  
106 data upon which resource-planning depends [20], as detection of individuals  
107 who have cleared infection, as well as false positives, may have led to over-  
108 estimation of HCV prevalence. As a result, there has been a progressive  
109 move towards using HCV-Ag and/or HCV PCR to determine accurately the  
110 population prevalence of active infection [1]. Although sensitivity and  
111 specificity of HCV-Ag testing appears to perform well when compared head-  
112 to-head with PCR [7, 13], there are still potential doubts over whether this test  
113 is adequately sensitive to be widely implemented as a primary screening tool,  
114 and recent WHO guidelines continue to recommend use of the HCV-Ab test  
115 as first line [1]. A careful balance must be struck between managing cost and  
116 optimising specificity without sacrificing sensitivity [21-24].

117

118 We here set out to assess our progress in diagnosing and treating HCV  
119 infection in a tertiary referral UK hospital, in the context of global aspirations  
120 for elimination. We reviewed the performance of our local HCV testing  
121 protocol in two different time periods, first when screening was undertaken  
122 using an HCV-Ab test only, and subsequently following the introduction of a  
123 combined approach using both HCV-Ab and HCV-Ag testing. In each case,  
124 we went on to evaluate further using HCV PCR. Collating these data allowed  
125 us to evaluate the performance of different diagnostic tests, to describe the  
126 epidemiology of our local cohort, and to determine the proportion of those with  
127 active HCV infection who attend a hepatology clinic and receive treatment.

128

129 **METHODS**

130 **Setting and cohort**

131 Our microbiology laboratory serves a large UK tertiary referral and teaching  
132 centre (<http://www.ouh.nhs.uk/>) that provides one million patient contacts a  
133 year, and handles samples referred from the community as well as four in-  
134 patient sites. We retrospectively interrogated electronic microbiology records  
135 for all HCV screening tests performed within two defined time-intervals, during  
136 which different diagnostic algorithms were operating. These are summarized  
137 in Fig 1 and outlined as follows:

- 138 i. **Group 1** (18 months; January 2013 - June 2014; Fig 1A). During this  
139 period, samples were screened for HCV-Ab using an ADVIA Centaur  
140 automated immunoassay (Bayer). HCV-Ab-positive samples (excluding  
141 repeat samples from patients with a pre-existing HCV diagnosis) were  
142 sent for confirmatory testing by the regional reference laboratory  
143 (Public Health England, Colindale), using two further ELISA tests  
144 (Ortho and BioRad). Antibody positive samples (based on sample:cut-  
145 off ratio >1) were tested for HCV RNA using Abbott HCV M2000 assay.
- 146 ii. **Group 2** (15 months; January 2015 - March 2016; Fig 1B). HCV  
147 diagnosis during this period was undertaken using a combination of  
148 HCV-Ab and HCV-Ag testing using Abbott Architect i2000SR with  
149 Diasorin Liason XL for confirmation of HCV-Ab. HCV-Ag assay  
150 positives are in the range 10-20,000 fmol/L.

151

152 For those testing positive with the initial screening test, we then collected  
153 follow-up testing data (per algorithms in Fig 1). We recorded patient age, sex,  
154 and the location from which the sample was sent. Treatment data were

155 captured and recorded from an electronic database within the Hepatology  
156 Department. Response to treatment was defined as SVR<sub>12</sub> (sustained  
157 virologic response at ≥12 weeks following the end of therapy).

158

159 Ethnic origin is not routinely captured data in hospital electronic systems. Prior  
160 to anonymisation, we therefore used an analytical tool to estimate ethnicity,  
161 applying Onolytics software for all patients for whom a full name was part of  
162 the electronic record (<http://onolytics.com> [25-27]). This software was  
163 developed in 2006-7 funded by Economic and Social Research Council  
164 (ESRC) Knowledge Transfer Partnerships, and sets out to determine probable  
165 ethnic origin based on name.

166

#### 167 **Data analysis**

168 Statistical analysis was performed using GraphPad Prism v.7.0b and  
169 Googlesheets (<https://docs.google.com/spreadsheets>). We compared binary  
170 values using Fisher's Exact Test, Mann-Whitney U test for continuous non-  
171 parametric data and linear regression for correlation between continuous  
172 variables.

173

#### 174 **Ethics approval**

175 Ethics approval was not required, as this study was undertaken as a  
176 departmental quality improvement exercise within microbiology using  
177 anonymised patient data, and completed the audit cycle for previously  
178 approved audit projects [28, 29]. Data for Onolytics analysis were handled



179 separately and were subject to a confidential disclosure agreement drawn up  
180 by University of Oxford Research Services (February 2016).

181

## 182 RESULTS

### 183 HCV testing: prevalence and characteristics of infection

184 In total, we present data for 38,510 HCV tests done during the two intervals  
185 reviewed. On average testing increased slightly, from an average of 1068  
186 tests / month during the earlier phase of the study (Group 1) up to 1286 tests /  
187 month in the later time period (Group 2); (Fig 1).

188

189 In total, 359 new active HCV infections were identified and confirmed during  
190 the two testing periods ( $359 / 38,510 = 0.9\%$  of all tests performed; Fig 1).

191 Characteristics of these individuals are summarised in Table 2 and the  
192 complete metadata are available on-line

193 (<https://doi.org/10.6084/m9.figshare.5355097.v2>). The median age was 37

194 years (IQR 31-48) and there was a consistent male excess, with men  
195 representing 55% of those tested [28] but 85% of all new diagnoses (Table 2).

196 Over one-third (36%) of new diagnoses were made in prison. Of the  
197 remainder, the majority were in primary care or attending hospital outpatient  
198 departments.

199

200 **Table 2: Characteristics of individuals with active HCV infection in a UK**  
201 **teaching hospital in two time windows between 2014 and 2016**  
202

|  | Group 1<br>(2014) | Group 2<br>(2016) | Group 1 +<br>Group 2<br>(2014-2016) |
|--|-------------------|-------------------|-------------------------------------|
|--|-------------------|-------------------|-------------------------------------|

|                                                          |             |             |             |
|----------------------------------------------------------|-------------|-------------|-------------|
| Total number confirmed positive for active HCV infection | 194         | 165         | 359         |
| Number male (% of positive tests)                        | 167 (86.1%) | 137 (83.0%) | 304 (84.7%) |
| Age in years (median and IQR)                            | 39 (31-49)  | 37 (30-44)  | 37 (31-48)  |
| Location                                                 |             |             |             |
| - Prison                                                 | 63 (32.5%)  | 66 (40.7%)  | 129 (36.2%) |
| - Hospital in-patient                                    | 15 (7.7%)   | 13 (8%)     | 28 (7.9%)   |
| - Hospital out-patient / primary care                    | 90 (46.4%)  | 64 (38.8%)  | 154 (42.9%) |
| - Sexual health clinic                                   | 16 (8.2%)   | 13 (7.9%)   | 29 (8.1%)   |
| - Occupational health                                    | 2 (1%)      | 1 (0.6%)    | 3 (0.8%)    |
| - Primary care for homeless (drug and alcohol service)   | 8 (4.2%)    | 8 (4.8%)    | 16 (4.5%)   |
| Ethnic origin                                            |             |             |             |
| - Black                                                  | 7 (3.6%)    | 1 (0.6%)    | 8 (2.2%)    |
| - Asian                                                  | 18 (9.3%)   | 7 (4.2%)    | 25 (7.0%)   |
| - European                                               | 149 (76.8%) | 97 (60.7%)  | 246 (69.4%) |
| - Unknown                                                | 20 (10.3%)  | 57 (34.5%)  | 77 (21.4%)  |

203 Numbers of positive tests are shown with percentage of positive tests in brackets.  
 204 Median age for each group is shown with IQR in brackets.  
 205

206 Genotype was available in 250 cases (70% of new diagnoses), with  
 207 genotypes 1 and 3 accounting for the majority (44% each; Fig. 2). This is in  
 208 keeping with the overall genotype distribution reported for Europe [30], and  
 209 Public Health England data (90% of all cases accounted for by genotypes 1  
 210 and 3) [31].

211

## 212 **HCV-Ab test outcomes and performance**

213 In the earlier testing period (Group 1), 277 of 317 HCV-Ab positive samples  
 214 were positive on confirmatory testing for HCV-Ab at the reference laboratory  
 215 (Fig 1A), giving our in-house test a positive predictive value (PPV) of 87.4%  
 216 compared to a regionally accepted standard. We used these results to  
 217 investigate whether any host factors are associated with false positive

218 antibody tests, and found that individuals identified as African have a higher  
219 chance of a false-positive HCV Ab test (Fig 3). We confirmed this result by  
220 multivariate logistic regression analysis, in which African ethnicity was  
221 significantly associated with a false positive Ab test result ( $p=0.0004$ ), but age  
222 >60 years and gender were not. Prison location was associated with a true  
223 positive Ab-test result ( $p=0.01$ ).

224

### 225 **HCV-Ag test outcomes and performance**

226 In the later testing period (Group 2), the PPV of the combined use of HCV-Ab  
227 plus HCV-Ag was 100% when compared to a gold-standard diagnostic test  
228 using PCR (Table 3). This exceeds a previous estimation of the PPV of the Ag  
229 test (94.7%) calculated from assimilation of data from other comparable  
230 reports [13].

231

232 **Table 3: Outcome of diagnostic testing for HCV infection using core**  
233 **antigen detection (HCV-Ag) compared to gold standard PCR for HCV**  
234 **RNA.**

| <b>Outcome</b>             | <b>Result (n)*</b> |
|----------------------------|--------------------|
| True positive              | 107                |
| False negative             | 7                  |
| False positive             | 0                  |
| True negative              | 66                 |
| <b>Test characteristic</b> | <b>Result (%)</b>  |
| Sensitivity                | 93.9               |
| Specificity                | 100                |
| Positive predictive value  | 100                |
| Negative predictive value  | 90.4               |

235 \*Results pertain to all HCV-antibody individuals in 'Group 2' of the study, from  
236 2016 onwards. Subjects analysed from Group 2 only, true positives (HCV-Ag+

237 and HCV RNA+); false negatives (HCV Ag- and HCV RNA+); false positives  
 238 (HCV Ag+ and HCV RNA-); true negatives (HCV Ag- and HCV RNA-).  
 239

240 We explored the relationship between HCV-Ag and HCV RNA. Individuals  
 241 with a positive HCV-Ag test had a median HCV viral load of  $6.3 \times 10^5$  IU/ml  
 242 (Fig 4A), and there was a significant positive correlation between quantitative  
 243 antigenaemia and viral load ( $r=0.67$ ,  $p<0.0001$ ; Fig 4B). This suggests that, in  
 244 the absence of having access to a quantitative PCR result, HCV-Ag is a good  
 245 surrogate marker of viraemia. However, in a small proportion of cases, the  
 246 antigen test results in false negative results (Table 4). There are no consistent  
 247 features that unify these misleading HCV-Ag results; in particular there was  
 248 no clear relationship between false negative HCV-Ag and low viral load  
 249 (although one sample had HCV RNA 25 IU/ml).

250

251 **Table 4: Summary of patients who tested false negative for HCV core**  
 252 **antigen, using HCV RNA PCR as a gold-standard reference test.**

| Age group (years) | Sex | Patient location | Ethnicity | HIV status | HCV Ag (fmol/ml) | HCV Ab (sample/cut-off ratio) | Geno-type | HCV viral load (IU/ml) |
|-------------------|-----|------------------|-----------|------------|------------------|-------------------------------|-----------|------------------------|
| 30-39             | F   | Sexual health    | Unknown   | negative   | 0.0              | 11.8                          | IS        | 25                     |
| 40-49             | M   | GP               | European  | negative   | 0.0              | 12.2                          | NR        | 226                    |
| 50-59             | F   | Medicine         | European  | yes        | 0.0              | 3.1                           | IS        | 302                    |
| 20-29             | M   | Prison           | European  | negative   | 0.62             | 14.2                          | 2b        | 2916                   |
| 20-29             | M   | Prison           | European  | NR         | 0.00             | 12.6                          | NR        | 8232                   |
| 30-39             | F   | Out-patient      | European  | NR         | 1.98             | 15.8                          | 1b        | 13860                  |
| 30-39             | M   | Prison           | European  | negative   | 0.00             | 12.2                          | 3a        | 174834                 |

253 NR = not requested; IS = insufficient sample. Total number of HCV core antigen tests  
 254 carried out in this period  $n=306$ . False negative subject ( $n=7$ ) HCV RNA viral loads  
 255 did not differ significantly to others ( $p=0.187$  Mann Whitney U test). None of the

256 patients with a false negative result underwent a repeat Ag test so laboratory error  
 257 cannot be ruled out in this instance.  
 258

259 Of 359 patients with a new HCV diagnosis, 117 (33%) attended a hepatology  
 260 clinic appointment, 76 were treated (21%) and 48 had an outcome of SVR<sub>12</sub>  
 261 (13%). These data illustrate the substantial loss of patients at each step of the  
 262 clinical pathway (Fig 5; Table 5), due to a combination of factors including  
 263 poor linkage between services, itinerant populations, individuals who are drug  
 264 users and/or in prison, and deaths.

265

266 **Table 5: Summary of clinical care outcomes in 359 patients with a**  
 267 **diagnosis of chronic HCV infection**  
 268

| Treatment Status                     | Patient Classification                                                   | Number (%)  |
|--------------------------------------|--------------------------------------------------------------------------|-------------|
| <b>Not treated</b>                   | Offered appointment but did not attend                                   | 46 (12.8)   |
|                                      | Seen in sexual health clinic                                             | 28 (7.8)    |
|                                      | Seen by hepatology but not yet treated                                   | 24 (6.7)    |
|                                      | Died                                                                     | 11 (3.1)    |
|                                      | Transferred out of area                                                  | 10 (2.8)    |
|                                      | Spontaneous clearer                                                      | 3 (0.8)     |
| <b>Treated or awaiting treatment</b> | Treated - sustained virologic response at ≥12 weeks (SVR <sub>12</sub> ) | 47 (13.1)   |
|                                      | Treated - no outcome data                                                | 20 (5.6)    |
|                                      | Awaiting treatment                                                       | 9 (2.5)     |
|                                      | Treated – relapsed                                                       | 8 (2.2)     |
| <b>Unknown</b>                       | No data / not known in Oxford                                            | 149` (41.5) |
|                                      | Prison clinic                                                            | 3 (0.8)     |
|                                      | Paediatric clinic                                                        | 1 (0.3)     |
| <b>TOTAL</b>                         |                                                                          | 359 (100)   |

269

270

271 This study was not designed to examine or report on the outcomes of  
272 treatment. However, we examined existing treatment data (Suppl data table)  
273 to look for evidence of different outcomes between genotypes 1 and 3. Among  
274 genotype 1 infections, we recorded 28 cases of SVR<sub>12</sub>, and two cases who  
275 relapse. For genotype 3, there were 16 cases of SVR<sub>12</sub> and five relapses.  
276 This difference did not reach statistical significance (p=0.1, Fisher's Exact  
277 Test).

278

## 279 **DISCUSSION**

### 280 **Summary comments**

281 Careful scrutiny of HCV testing and treatment is important so that best efforts  
282 can be made to diagnose and treat individuals with active infection in order to  
283 optimize the benefits of recent therapeutic advances, and to move towards  
284 United Nations Sustainable Development Goals [3, 6]. Our study indicates a  
285 high workload of HCV-screening in a UK teaching hospital laboratory (>1000  
286 tests performed each month). Overall, 0.9% of these were confirmed to have  
287 active HCV infection, with a substantial excess among males, and over one-  
288 third from the prison population. Following the implementation of HCV-Ag  
289 testing as part of the diagnostic algorithm, the PPV of a positive test increased  
290 to 100%, slightly exceeding that reported by other recently published studies  
291 [13]. In keeping with national and international data, genotypes 1 and 3  
292 predominate [30, 31], with a trend towards better outcome in treatment of  
293 genotype 1 infection.

294

295 **Relevance to laboratory and clinical practice**

296 Although HCV-Ag testing can potentially replace a nucleic acid test for HCV  
297 diagnosis or monitoring in some settings [13, 32, 33], guidelines from the UK  
298 [9], North America [34] and the WHO [1] still advocate use of PCR as a  
299 definitive test following HCV-Ab ( $\pm$  HCV-Ag) screening. RNA PCR also  
300 remains the gold-standard approach to monitoring progress during and after  
301 treatment and is required for genotyping which is currently still important to  
302 underpin optimum choice of DAA regimen, despite an ultimate desire to  
303 develop pan-genotype treatment [35]. Ultimately, therefore, reducing the cost  
304 of PCR may be a more desirable outcome than focusing on improving the  
305 sensitivity of antigen detection.

306

307 The small proportion of all diagnosed patients who access clinical care and  
308 receive successful treatment is in keeping with that reported in other centres  
309 including recently by a London centre [36], reflecting many challenges for  
310 HCV elimination. Our data highlight the particular attention that is needed for  
311 the vulnerable prison population; with a worldwide estimate of 15% HCV  
312 prevalence in prisoners worldwide [37], this is an issue that demands urgent  
313 international attention. Offering treatment within the prison system has now  
314 become a realistic possibility, on the basis of oral DAA therapy, shortened  
315 treatment regimens (regimens of 12 to 24-weeks, and possibly shorter), and a  
316 low rate of side-effects [38].

317

318 In the longer term, bigger datasets are required to improve our insights into  
319 this patient population, and to identify areas where additional resource and  
320 investment is required. Substantial efforts are underway, with funding  
321 underpinned by the UK National Institute for Health Research (NIHR) through  
322 the NHIR Health Informatics collaborative (NHIC), to improve the collation of  
323 clinical and laboratory data for patients with viral hepatitis, in order to develop  
324 and strengthen links between patient care, laboratory microbiology, and  
325 research questions [36].

326

### 327 **Significance of male excess**

328 There are emerging data to suggest a genuine discrepancy in susceptibility to,  
329 and outcomes of, infection between males and females [39, 40], but in this  
330 instance the male predominance may be accounted for by behaviour (e.g.  
331 among MSM and PWID) rather than biological differences. In the context of  
332 this study we do not have the careful prospective socio-demographic data that  
333 would be required to investigate this further.

334

### 335 **Caveats and limitations**

336 Our analysis must be set in the overall context of the low prevalence of HCV  
337 in our setting, and the retrospective approach to data collection. Such  
338 approaches to estimation of epidemiology underestimate the true prevalence,  
339 as a result of a large pool of individuals who are HCV-infected but never  
340 receive a test [6].

341



342 The rate of false negative HCV tests in our population is likely to be low, but  
343 quantifying this was not possible within this study, as we relied on identifying  
344 samples that initially tested positive. In order to ascertain the PPV of the HCV-  
345 Ab test in-house, we referred to a Reference Laboratory test as ‘gold  
346 standard’. However, this repeat testing in a Reference Laboratory setting is  
347 itself subject to an error rate, and therefore may lead to a misrepresentation of  
348 our overall assay performance.

349

350 We found evidence that the HCV-Ab test performs poorly in individuals  
351 predicted to be of African origin; similarly, a similar high rate of false positive  
352 tests has previously been reported from Polynesia [41]. This illustrates how  
353 tests that have been developed and tested in white European/Caucasian  
354 populations cannot necessarily be robustly applied in other settings,  
355 potentially contributing to global healthcare inequalities. Although name can  
356 be a reliable surrogate for ethnic background, and the tools used here have  
357 been validated [26, 27], this remains an imperfect way to derive ethnic origin  
358 and is potentially confounded by a variety of factors, the most obvious of  
359 which is individuals who change their name (usually in the setting of  
360 marriage).

361

362 In our setting, the sexual health clinic anonymises patient data which prevents  
363 robust linkage between services, and we are unable to trace outcomes for  
364 patients who were diagnosed via this route (8% of the total; Table 2).  
365 Likewise, consistent identification and tracing of individuals who are drug

366 users and/or in prison is challenging, and we cannot exclude the possibility of  
367 duplication of some of these individuals within our dataset.

368

### 369 **Performance of HCV-Ag test**

370 We identified seven patients in this cohort in whom there was discordance  
371 between HCV-Ag (negative) and HCV RNA results (positive). There was no  
372 consistent feature (age, sex, patient location, genotype of HCV infection) that  
373 unified these individuals (Table 4). One potential explanation for  
374 discrepancies is mutations in the core region of the HCV genome which could  
375 account for a failure of antigen detection [42], or potentially cause lack of PCR  
376 amplification if mutations occur in the regions required for primer binding.

377

### 378 **Global context**

379 Moving towards the SDG target [2] requires a multi-faceted approach, with  
380 focus on optimization of laboratory testing and reduction of costs in order to  
381 improve access to accurate diagnosis, advocacy for better testing and  
382 treatment for populations in resource-limited settings, allocating resources in  
383 order to deliver curative therapy supported by appropriate monitoring,  
384 targeting interventions at high-risk populations including MSM, PWID and  
385 prisons, and ensuring that individuals diagnosed with infection are offered –  
386 and receive – clinical care and follow-up.

387

### 388 **DECLARATIONS**

#### 389 **Ethics approval and consent to participate**

390 No specific ethics approval was required for this study as it was undertaken  
391 as a combination of audit and quality improvement from within a clinical  
392 microbiology laboratory and hepatology service; data were anonymised prior  
393 to analysis and no interventions were implemented.

394

#### 395 **Consent for publication**

396 Not applicable.

397

#### 398 **Availability of data and material**

399 The datasets generated and/or analysed during the current study are  
400 available in the Figshare repository  
401 [<https://doi.org/10.6084/m9.figshare.5355097.v1>].

402

#### 403 **Competing interests**

404 MA has received research funding from Gilead.

405

#### 406 **Funding**

407 PCM received research salary from the NIHR during the course of this  
408 research and is now funded by the Wellcome Trust (grant number 110110).  
409 EB is supported by the MRC as a Senior Clinical Fellow. Oxford NIHR BRC  
410 has supported the development of the Oxford HCV cohort.

411

#### 412 **Authors' contributions**

413 Study conception and design: PK, KJ, PCM. Data collection: GJ, LD, VW,  
414 GW. Running and interpreting clinical laboratory tests: GJ, MA, KJ, PCM.

415 Data analysis: EA, AM, PK, KJ, PCM. Involved in management of clinical  
416 cohort: JC, EB, PK, KJ, PCM. Wrote the manuscript: EA, PCM, with editorial  
417 input from AM, MA. All authors read and approved the final manuscript.

418

#### 419 **Acknowledgements**

420 A subset of these data was presented as a poster at the UK Federation of  
421 Infection Societies (FIS) conference, November 2014 [28].

422

#### 423 **Authors' information**

424 EB is the lead for the UK STOP-HCV program. PCM is a Wellcome Trust  
425 Clinical Research Fellow with interests in chronic HBV and HCV infection.

426

#### 427 **FIGURE LEGENDS:**

428

429 **Figure 1: Algorithms describing approach to, and results of, HCV**  
430 **diagnostic testing in a UK teaching hospital laboratory in 2014 (A) and**  
431 **2016 (B).**

432

433 **Figure 2: Distribution of HCV genotypes in a UK cohort.** Data for 250  
434 individuals with a new laboratory diagnosis of HCV infection are shown. There  
435 was no enrichment of a specific genotype in the prison population (prison  
436 population accounted for 30/84 geno-1 infections, and 34/80 geno-3 infections;  
437  $p=0.4$  Fisher's Exact Test).

438

439 **Fig 3: False positive HCV IgG antibody results according to ethnic origin**  
440 **in a UK cohort.** Ethnicity was estimated using Onolytics software [26, 27].  
441 Data shown are for a cohort recruited starting in 2014, screened using an in-  
442 house HCV-Ab (ADVIA Centaur automated immunoassay; Bayer) and  
443 confirmed using two further ELISA tests (Ortho and BioRad). 'False positives'  
444 are defined as those screening positive on ADVIA and negative on  
445 confirmation, 'true positives' are defined as samples positive on all three tests.  
446 P-values obtained by Fishers Exact Test shown as \*  $p < 0.05$ , \*\*  $p < 0.005$ , \*\*\*  
447  $p < 0.0005$ .

448

449 **Figure 4: Relationship between HCV Antigen test and quantitative PCR**  
450 **for HCV RNA viral load.** (A) Range of HCV viral loads for samples testing  
451 HCV-Ag positive (n=107) and HCV-Ag negative (n=73). (B) Linear regression  
452 plot showing correlation between HCV-Ag and HCV-RNA for all samples  
453 testing HCV-Ag positive (n=108). Dashed lines represent threshold for  
454 detection for HCV RNA (15 IU/ml) and HCV-Ag (10 fmol/ml).

455

456 **Figure 5: Graphical representation of the disparity between the number**  
457 **of individuals diagnosed with active HCV infection and those who**  
458 **access clinical review, treatment, and achieve SVR.** Summary of  
459 outcomes for the entire cohort is shown in table 4. The percentages quoted in  
460 this figure represent the proportion of patients in each category from the total  
461 denominator of 359. Among those with a known treatment outcome, 30/129  
462 (23%) of those from prison attended a clinic appointment, while in the non-

463 prison populations 160/230 (70%) have already been seen or have an

464 appointment to be seen in clinic ( $p < 0.0001$ , Fisher's Exact Test).

465

466

467 **REFERENCES:**

- 468 1. *Hepatitis C: Fact Sheet Number 164*. 2017 [cited 2017; Available from:  
469 <http://www.who.int/mediacentre/factsheets/fs164/en/>.
- 470 2. *World Health Organisation Global Health Sector Strategy on Viral Hepatitis*  
471 *2016-2021: towards ending viral hepatitis*. 2016.
- 472 3. Griggs, D., et al., *Policy: Sustainable development goals for people and*  
473 *planet*. *Nature*, 2013. **495**(7441): p. 305-7.
- 474 4. Jakobsen, J.C., et al., *Direct-acting antivirals for chronic hepatitis C*.  
475 *Cochrane Database Syst Rev*, 2017. **6**: p. CD012143.
- 476 5. Smith, B.D., et al., *Rapid diagnostic HCV antibody assays*. *Antivir Ther*,  
477 2012. **17**(7 Pt B): p. 1409-13.
- 478 6. *Public Health England. Hepatitis C in the UK 2017 report. PHE publications*  
479 *gateway number 2017207*
- 480 7. Easterbrook, P.J. and W.H.O.G.D. Group, *Who to test and how to test for*  
481 *chronic hepatitis C infection - 2016 WHO testing guidance for low- and*  
482 *middle-income countries*. *J Hepatol*, 2016. **65**(1 Suppl): p. S46-66.
- 483 8. Reyes-Mendez, M.A., et al., *Comparison of two diagnostic algorithms for the*  
484 *identification of patients with HCV viremia using a new HCV Antigen test*.  
485 *Ann Hepatol*, 2014. **13**(3): p. 337-42.
- 486 9. *Investigation of Hepatitis C Infection by Antibody Testing or Combined*  
487 *Antigen/Antibody Assay*. UK Standards for Microbiology Investigations,  
488 2014. **5**.
- 489 10. Wang, L., H. Lv, and G. Zhang, *Hepatitis C virus core antigen assay: an*  
490 *alternative method for hepatitis C diagnosis*. *Ann Clin Biochem*, 2017.  
491 **54**(2): p. 279-285.
- 492 11. Medici, M.C., et al., *Evolving strategy for HCV testing in an Italian tertiary*  
493 *care hospital*. *J Clin Virol*, 2016. **77**: p. 92-8.
- 494 12. Moini, M., et al., *Hepatitis C virus (HCV) Infection Rate among Seronegative*  
495 *Hemodialysis Patients Screened by Two Methods; HCV Core Antigen and*  
496 *Polymerase Chain Reaction*. *Hepat Mon*, 2013. **13**(6): p. e9147.
- 497 13. Khan, H., et al., *Can Hepatitis C Virus Antigen Testing Replace Ribonucleic*  
498 *Acid Polymearse Chain Reaction Analysis for Detecting Hepatitis C Virus? A*  
499 *Systematic Review*. *Open Forum Infect Dis*, 2017. **4**(2): p. ofw252.
- 500 14. Sakiani, S., C. Koh, and T. Heller, *Understanding the presence of false-*  
501 *positive antibodies in acute hepatitis*. *J Infect Dis*, 2014. **210**(12): p. 1886-  
502 9.
- 503 15. Narciso-Schiavon, J.L., et al., *Anti-HCV reactive blood donors: clinical and*  
504 *epidemiological factors associated with false-reactive results*. *Eur J*  
505 *Gastroenterol Hepatol*, 2008. **20**(11): p. 1071-6.
- 506 16. Ownby, H.E., et al., *Loss of volunteer blood donors because of unconfirmed*  
507 *enzyme immunoassay screening results*. *Retrovirus Epidemiology Donor*  
508 *Study*. *Transfusion*, 1997. **37**(2): p. 199-205.
- 509 17. Seremba, E., et al., *Poor performance of hepatitis C antibody tests in*  
510 *hospital patients in Uganda*. *J Med Virol*, 2010. **82**(8): p. 1371-8.
- 511 18. Agha, S., et al., *Prevalence of low positive anti-HCV antibodies in blood*  
512 *donors: Schistosoma mansoni co-infection and possible role of*  
513 *autoantibodies*. *Microbiol Immunol*, 2006. **50**(6): p. 447-52.

- 514 19. Srivastava, A.V., et al., *High rates of false-positive hepatitis C antibody tests*  
515 *can occur after left ventricular assist device implantation*. *ASAIO J*, 2013.  
516 **59**(6): p. 660-1.
- 517 20. Moorman, A.C., J. Drobeniuc, and S. Kamili, *Prevalence of false-positive*  
518 *hepatitis C antibody results, National Health and Nutrition Examination*  
519 *Study (NHANES) 2007-2012*. *J Clin Virol*, 2017. **89**: p. 1-4.
- 520 21. Maasoumy, B., et al., *How to interpret borderline HCV antibody test results:*  
521 *a comparative study investigating four different anti-HCV assays*. *Viral*  
522 *Immunol*, 2014. **27**(1): p. 7-13.
- 523 22. Maity, S., et al., *Performance and diagnostic usefulness of commercially*  
524 *available enzyme linked immunosorbent assay and rapid kits for detection*  
525 *of HIV, HBV and HCV in India*. *Virology*, 2012. **9**: p. 290.
- 526 23. Bloch, E.M., et al., *A pilot external quality assurance study of transfusion*  
527 *screening for HIV, HCV and HBsAg in 12 African countries*. *Vox Sang*, 2014.  
528 **107**(4): p. 333-42.
- 529 24. Contreras, A.M., et al., *Very low hepatitis C antibody levels predict false-*  
530 *positive results and avoid supplemental testing*. *Transfusion*, 2008. **48**(12):  
531 p. 2540-8.
- 532 25. Lakha, F., D.R. Gorman, and P. Mateos, *Name analysis to classify*  
533 *populations by ethnicity in public health: validation of Onomap in Scotland*.  
534 *Public Health*, 2011. **125**(10): p. 688-96.
- 535 26. Mateos, P., *Names, Ethnicity and Populations; Tracing Identity in Space*.  
536 2014: Springer: Heidelberg.
- 537 27. Mateos, P., *A Review of Name-based Ethnicity Classification Methods and*  
538 *their Potential in Population Studies*. *Population, Space and Place*, 2007.  
539 **13**: p. 243-263.
- 540 28. Matthews, P.C., G. Jesuthasan, and K. Jeffery, *Hepatitis C in a teaching*  
541 *hospital trust: translating diagnosis into treatment [version 1]*. *Poster [not*  
542 *peer reviewed]*. *F1000Research*, 2017. **6**:1147 (doi:  
543 **10.7490/f1000research.1114429.1**).
- 544 29. Hodgekiss, C., A. Shipman, and K. Jeffery, *Outcome of hepatitis C testing in*  
545 *the pre-protease era 2008 - 2012 [version 1; not peer reviewed]*. .  
546 *F1000Research* 2017, 6:1677 (poster).
- 547 30. Messina, J.P., et al., *Global distribution and prevalence of hepatitis C virus*  
548 *genotypes*. *Hepatology*, 2015. **61**(1): p. 77-87.
- 549 31. *Public Health England. Hepatitis C in the UK; 2015 report*. 2015 [cited  
550 2017 June]; Available from:  
551 [https://www.gov.uk/government/uploads/system/uploads/attachment](https://www.gov.uk/government/uploads/system/uploads/attachment_data/file/448710/NEW_FINAL_HCV_2015_IN_THE_UK_REPORT_28072015_v2.pdf)  
552 [data/file/448710/NEW\\_FINAL\\_HCV\\_2015\\_IN\\_THE\\_UK\\_REPORT\\_2807201](https://www.gov.uk/government/uploads/system/uploads/attachment_data/file/448710/NEW_FINAL_HCV_2015_IN_THE_UK_REPORT_28072015_v2.pdf)  
553 [5 v2.pdf](https://www.gov.uk/government/uploads/system/uploads/attachment_data/file/448710/NEW_FINAL_HCV_2015_IN_THE_UK_REPORT_28072015_v2.pdf).
- 554 32. Duchesne, L., et al., *HCV Ag quantification as a one-step procedure in*  
555 *diagnosing chronic hepatitis C infection in Cameroon: the ANRS 12336*  
556 *study*. *J Int AIDS Soc*, 2017. **20**(1): p. 1-8.
- 557 33. Cresswell, F.V., et al., *Hepatitis C core antigen testing: a reliable, quick, and*  
558 *potentially cost-effective alternative to hepatitis C polymerase chain*  
559 *reaction in diagnosing acute hepatitis C virus infection*. *Clin Infect Dis*,  
560 2015. **60**(2): p. 263-6.



- 561 34. *AASLD IDSA HCV Guidance Panel. Hepatitis C guidance: AASLD-IDSA*  
562 *recommendations for testing, managing, and treating adults infected with*  
563 *hepatitis C virus.* Hepatology, 2015. **62**(3): p. 932-54.
- 564 35. Weisberg, I.S. and I.M. Jacobson, *A pangenotypic, single tablet regimen of*  
565 *sofosbuvir/velpatasvir for the treatment of chronic hepatitis C infection.*  
566 *Expert Opin Pharmacother*, 2017. **18**(5): p. 535-543.
- 567 36. Jones, C.R., et al., *The NIHR Heath Informatics Collaborative: sharing*  
568 *electronic NHS clinical information to capture the hepatitis C treatment*  
569 *revolution.* 2017: [version 1; not peer reviewed]. F1000Research 2017,  
570 6:1838 (poster) doi: 10.7490/f1000research.1114972.1.
- 571 37. Dolan, K., et al., *Global burden of HIV, viral hepatitis, and tuberculosis in*  
572 *prisoners and detainees.* Lancet, 2016. **388**(10049): p. 1089-1102.
- 573 38. Martin, N.K., et al., *Is increased hepatitis C virus case-finding combined with*  
574 *current or 8-week to 12-week direct-acting antiviral therapy cost-effective*  
575 *in UK prisons? A prevention benefit analysis.* Hepatology, 2016. **63**(6): p.  
576 1796-808.
- 577 39. Ubeda, F. and V.A. Jansen, *The evolution of sex-specific virulence in*  
578 *infectious diseases.* Nat Commun, 2016. **7**: p. 13849.
- 579 40. Mori, M., et al., *Sex Differences in Antiretroviral Therapy Initiation in*  
580 *Pediatric HIV Infection.* PLoS One, 2015. **10**(7): p. e0131591.
- 581 41. Harrison, G.L., et al., *Infection frequency of hepatitis C virus and IL28B*  
582 *haplotypes in Papua New Guinea, Fiji, and Kiribati.* PLoS One, 2013. **8**(8): p.  
583 e66749.
- 584 42. Nguyen, L.T., et al., *Hepatitis C Virus Core Mutations Associated with False-*  
585 *Negative Serological Results for Genotype 3a Core Antigen.* J Clin Microbiol,  
586 2015. **53**(8): p. 2697-700.  
587

**Figure 1****A****Group 1: 2014**  
(18 month window)Total number of HCV-Ab tests performed  
= 19,226Total number of HCV-Ab tests positive =  
327/19,226 (1.7%)Total number of HCV-Ab tests new  
positive = 317/327 (96.9%)'False positive':  
HCV-Ab test negative by  
reference  
lab = 40/317 (12.6%)'True positive':  
HCV-Ab test confirmed  
positive by reference lab  
= 277/317 (87.4%)Total positive rate  
194/19,226 (1%)Number of cases positive  
for HCV RNA  
= 194/277 (70.0%)**B****Group 2: 2016**  
(15 month window)Total number of HCV-Ab tests performed  
= 19,283Total number of HCV-Ab tests positive =  
450/19,283 (2.3%)Total number of HCV-Ab tests new  
positive = 325/450 (72.2%)Total number of HCV-Ag tests performed  
= 305/1445 (21.2%)'Ag Reactive':  
HCV-Ag test positive =  
158/305 (51.8%)'Ag Non-Reactive':  
HCV-Ag test negative  
= 147/305 (48.2%)HCV RNA  
Not Done = 51/158 (31.7%)  
≥ 15 IU/ml = 107/158 (65.8%)HCV RNA  
Not Done = 74/147 (50.2%)  
<15 IU/ml = 66/147 (45%)  
≥ 15 IU/ml = 7/147 (4.8%)Total positive rate  
165/19,283  
(0.86%)

Figure 2

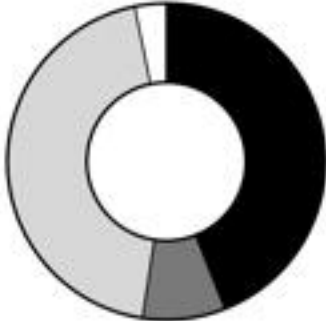

**HCV GENOTYPE**

- **Geno-1** *n=110*
- **Geno-2** *n=21*
- **Geno-3** *n=111*
- **Geno-4** *n=8*

Figure 3

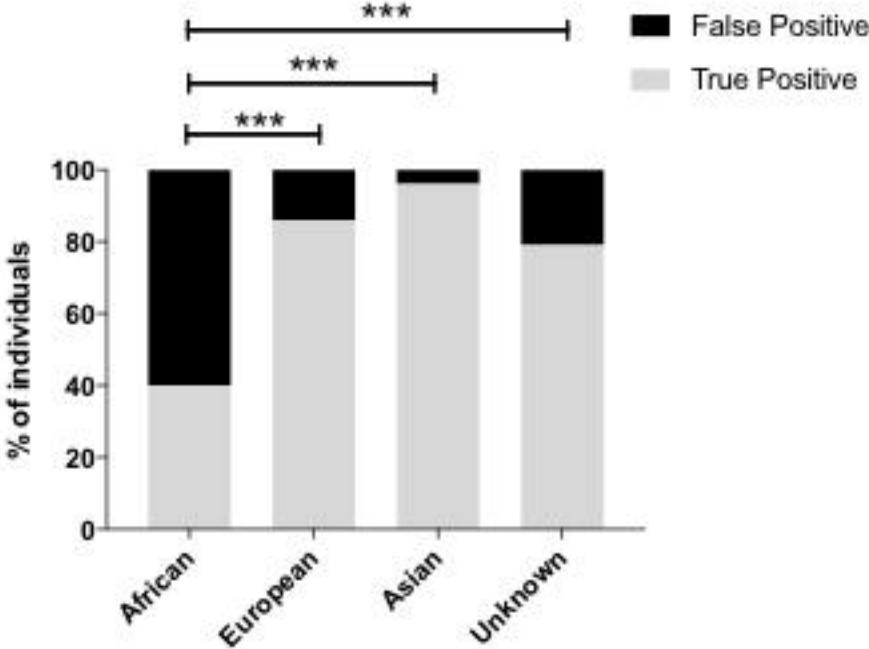

Figure 4

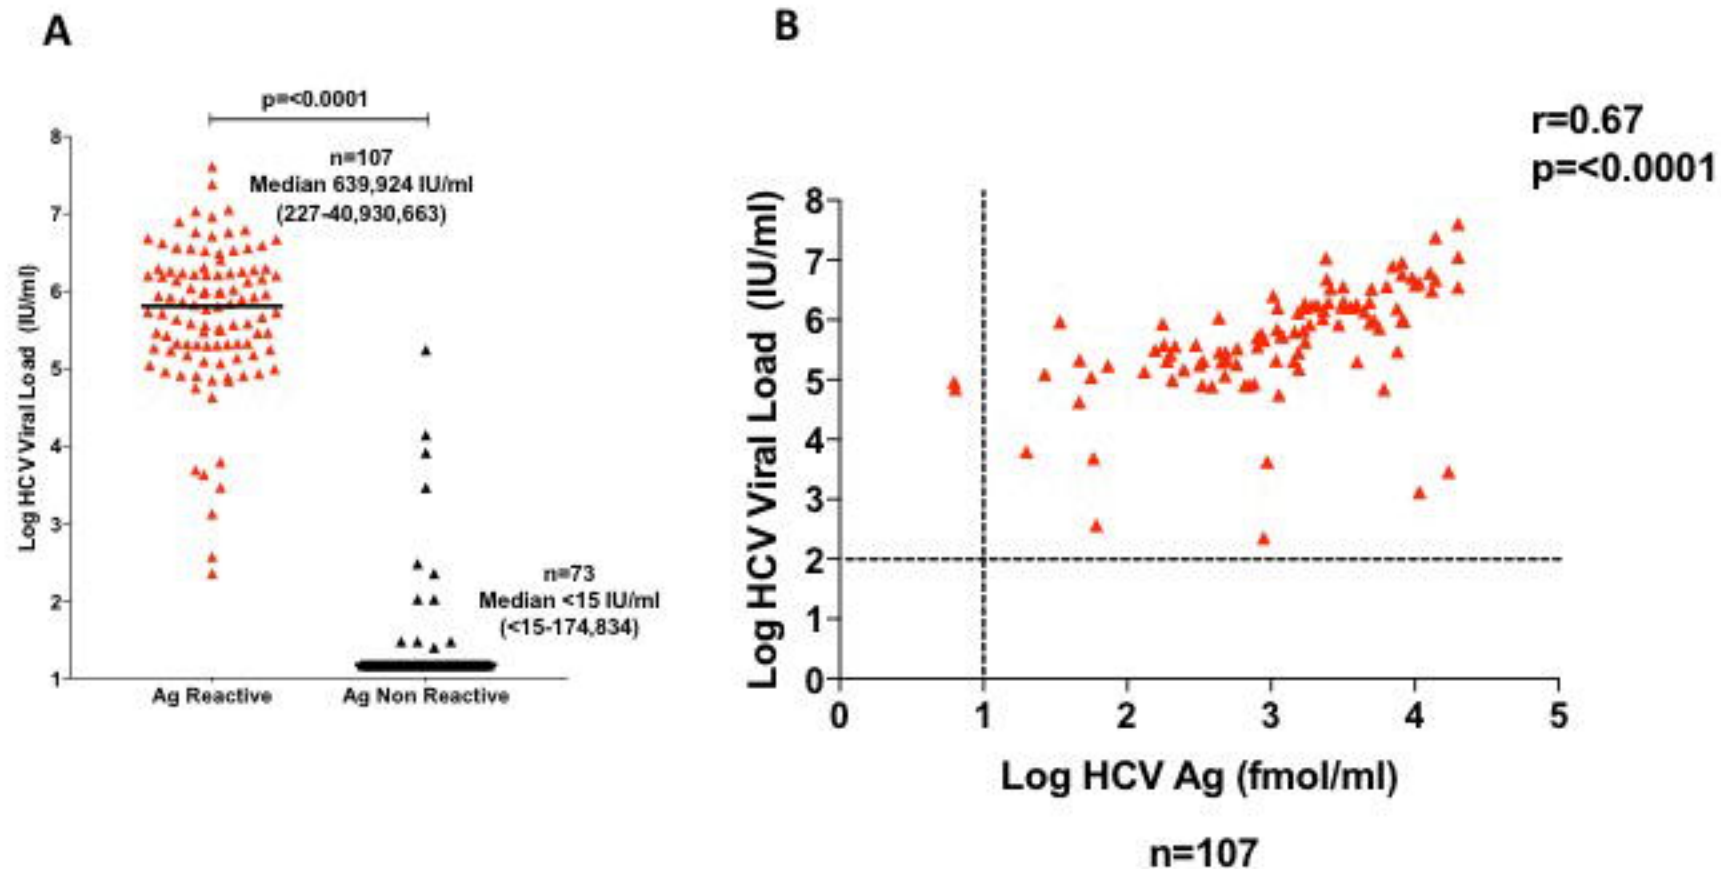

Fig 5

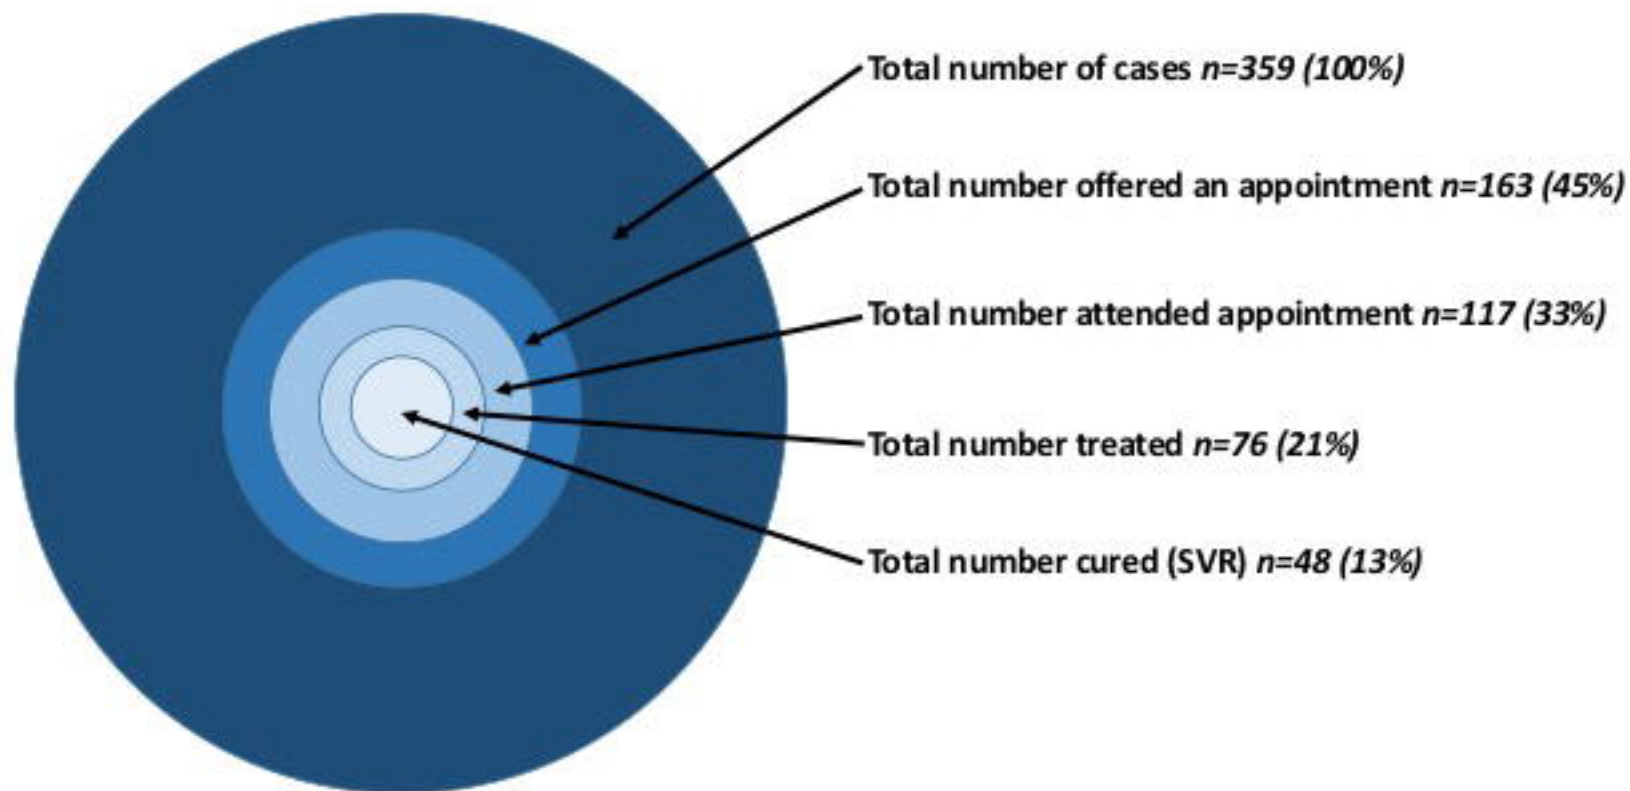

Source: https://www.biorxiv.org/content/early/2017/11/10/216937.full.pdf
